# Supplementary material
Source: PubMed Central journal article supplement (PMC7198381)
Supplement: jnm229351SupplementalData.pdf [file jnm229351SupplementalData.pdf]

# Supplemental information

## **<sup>18</sup>F-FAC PET visualizes brain-infiltrating leukocytes in a mouse model of multiple sclerosis**

Bao Ying Chen<sup>1,2</sup>, Chiara Ghezzi<sup>1,2</sup>, Brendon Villegas<sup>3</sup>, Andrew

Quon<sup>1,4</sup>, Caius G. Radu<sup>1,4</sup>, Owen N. Witte<sup>1,5,6</sup>, Peter M. Clark<sup>1,2,5</sup>

*<sup>1</sup> Department of Molecular and Medical Pharmacology, <sup>2</sup> Crump Institute for Molecular Imaging, <sup>3</sup> Department of Pulmonary and Critical Care Medicine, <sup>4</sup> Ahmanson Translational Imaging Division, <sup>5</sup> Eli and Edythe Broad Center of Regenerative Medicine and Stem Cell Research, <sup>6</sup> Department of Microbiology, Immunology, and Molecular Genetics, University of California, Los Angeles, CA 90095.*

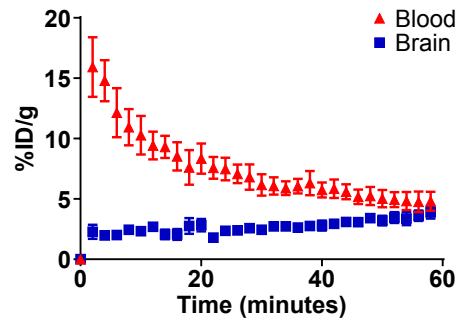

Supplemental Figure 1. Time-activity curves of  $^{18}\text{F}$ -FAC accumulation in the blood and brains of healthy mice.  $n=5$ .

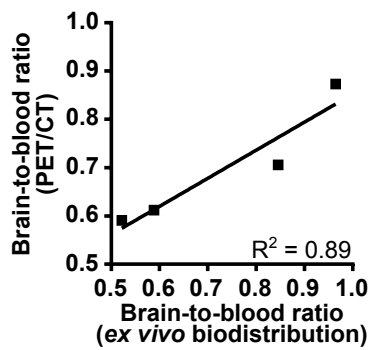

Supplemental Figure 2. Brain-to-blood ratios of  $^{18}\text{F}$ -FAC in healthy mice, as measured from the PET/CT images and *ex vivo* biodistribution studies.  $n=4$ .

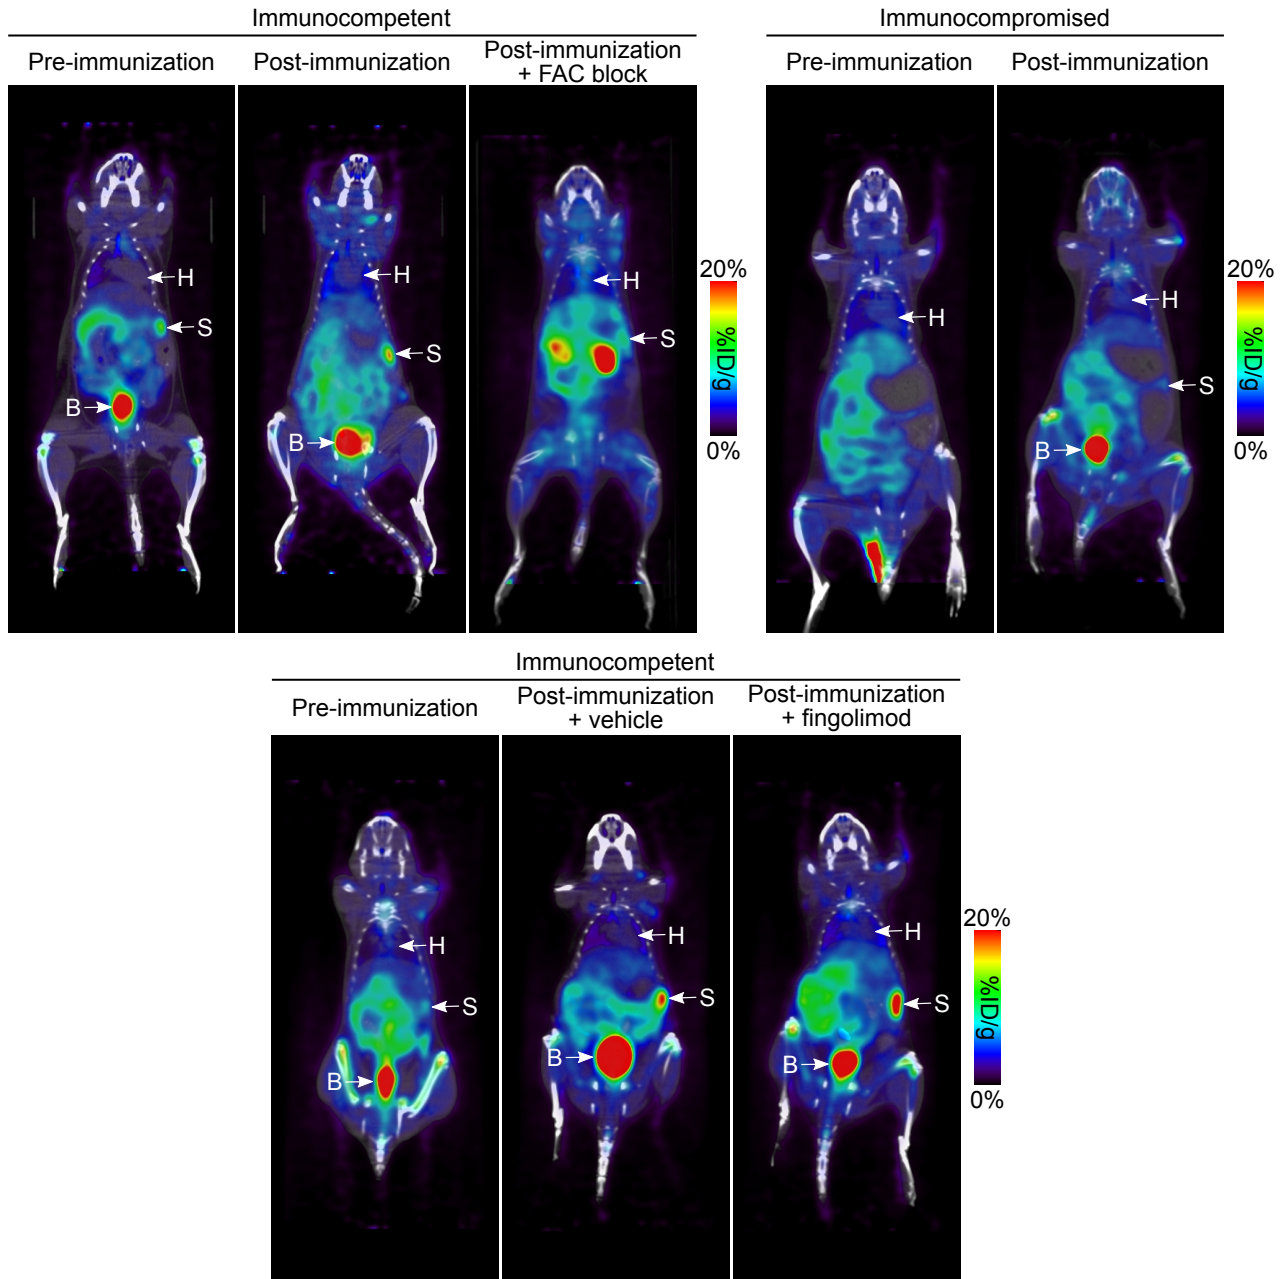

Supplemental Figure 3.  $^{18}\text{F}$ -FAC accumulation in immunocompetent and immunocompromised mice pre- and post-immunization, and co-injected with non-radiolabeled FAC (FAC block) or treated with vehicle or fingolimod. H = heart, S = spleen, B = bladder.



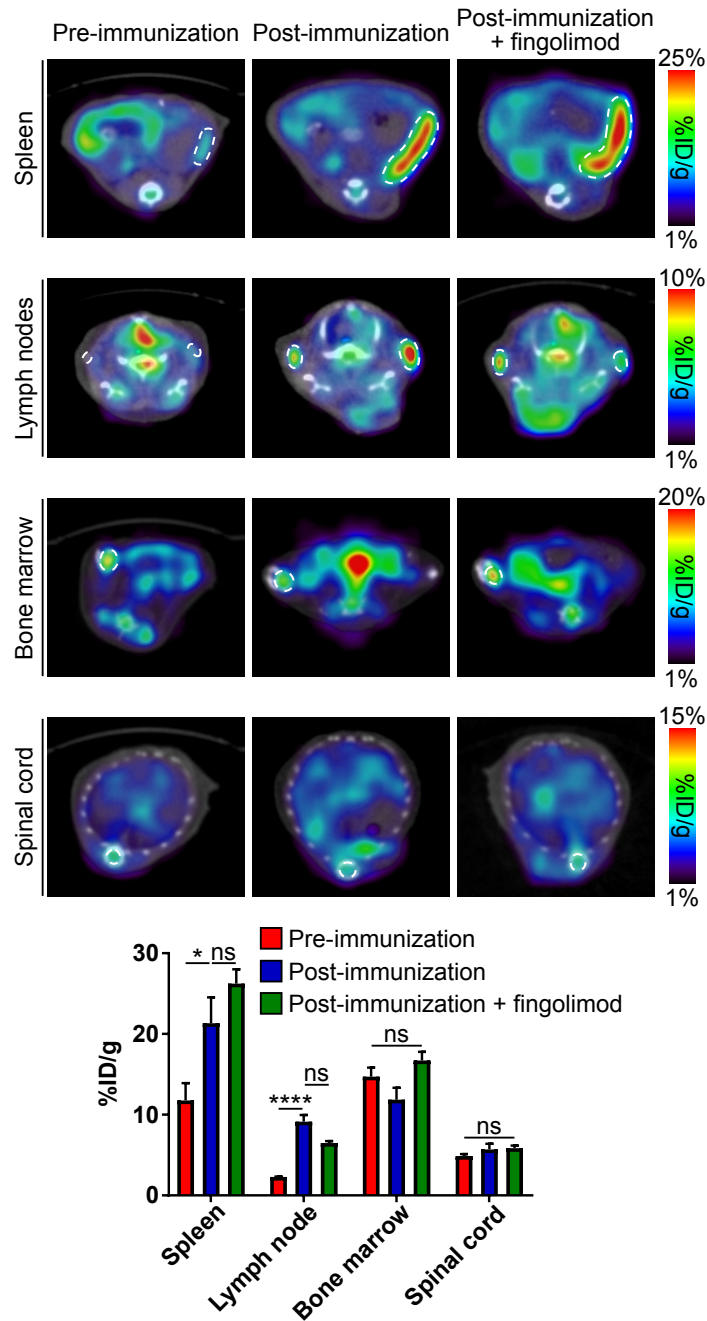

Supplemental Figure 4.  $^{18}\text{F}$ -FAC PET can be used to monitor peripheral immune activation at specific locations throughout the body in EAE mice and following treatment with an immunomodulatory drug. Representative transverse  $^{18}\text{F}$ -FAC PET/CT images of immunocompetent mice pre-immunization, post-immunization, and post-immunization and treated with fingolimod. Spleen, lymph nodes, bone marrow, and spinal cord encircled in a white dotted line (top). Quantification (bottom). Pre-immunization and post-immunization:  $n=7$ ; post-immunization and treated with fingolimod:  $n=3$ . \*:  $P<0.05$ ; \*\*\*\*:  $P<0.0001$ , ns: not significant.

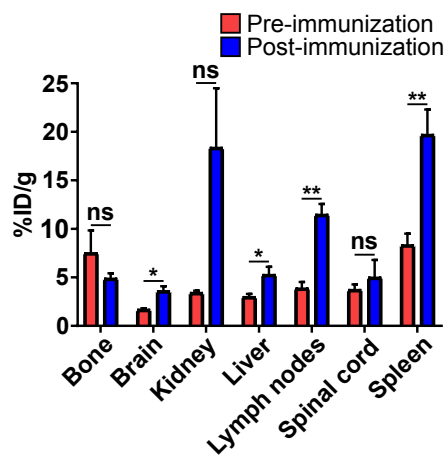

Supplemental Figure 5.  $^{18}\text{F}$ -FAC biodistribution, measured *ex vivo* in organs from immunocompetent mice pre- and post-immunization.  $n=4$  except for spinal cord which is  $n=3$ . \*:  $P<0.05$ , \*\*:  $P<0.01$ , ns: not significant.

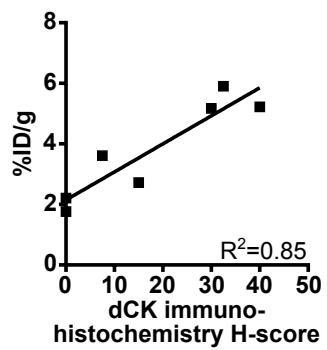

Supplemental Figure 6. dCK immunostaining (as measured by an immunohistochemistry H-score) and  $^{18}\text{F}$ -FAC accumulation in the brains of immunocompetent mice.  $n=7$ .

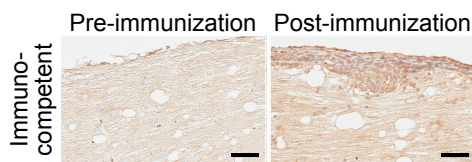

Supplemental Figure 7. dCK immunostaining of spinal cord tissue sections from immunocompetent mice pre- and post-immunization. 40x magnification images. Scale bars: 50 microns. Representative images of  $n=2$ .

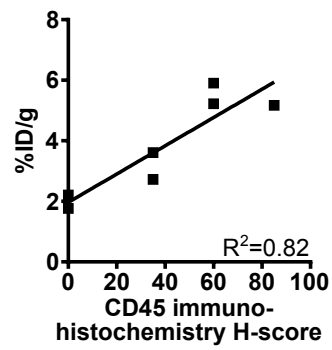

Supplemental Figure 8. CD45 immunostaining (as measured by an immunohistochemistry H-score) and  $^{18}\text{F}$ -FAC accumulation in the brains of immunocompetent mice.  $n=7$ .

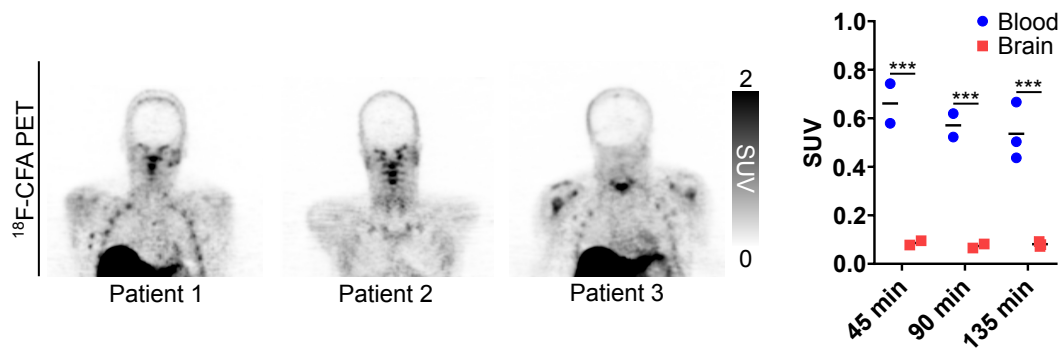

Supplemental Figure 9.  $^{18}\text{F-CFA}$  does not readily cross the blood-brain barrier in healthy human subjects. Representative coronal PET images of healthy volunteers injected with  $^{18}\text{F-CFA}$  at 135 min post-tracer injection (*left*). Blood and brain  $^{18}\text{F-CFA}$  accumulation, quantified from the PET images of healthy volunteers (*right*). The PET scans analyzed here are the same as those reported in Ref. 25. 45 and 90 min time point:  $n=2$ ; 135 min time point:  $n=3$ . \*\*\*:  $P<0.001$ .
